# Supplementary material for: Learning from the trees: biomimetic crosslinking of silicones by phenolic coupling
Source: Royal Society of Chemistry journal article supplement (doi:10.1039/d3gc01282d), 2023-01-01
Supplement: d3gc01282d1.pdf [file d3gc01282d1.pdf]

## Learning from the Trees: Biomimetic Crosslinking of Silicones by Phenolic Coupling

Angela Li,<sup>a</sup> Miguel Melendez-Zamudio,<sup>a</sup> Akop Yepremyan,<sup>a</sup> Michael A. Brook\*

### Supporting Information

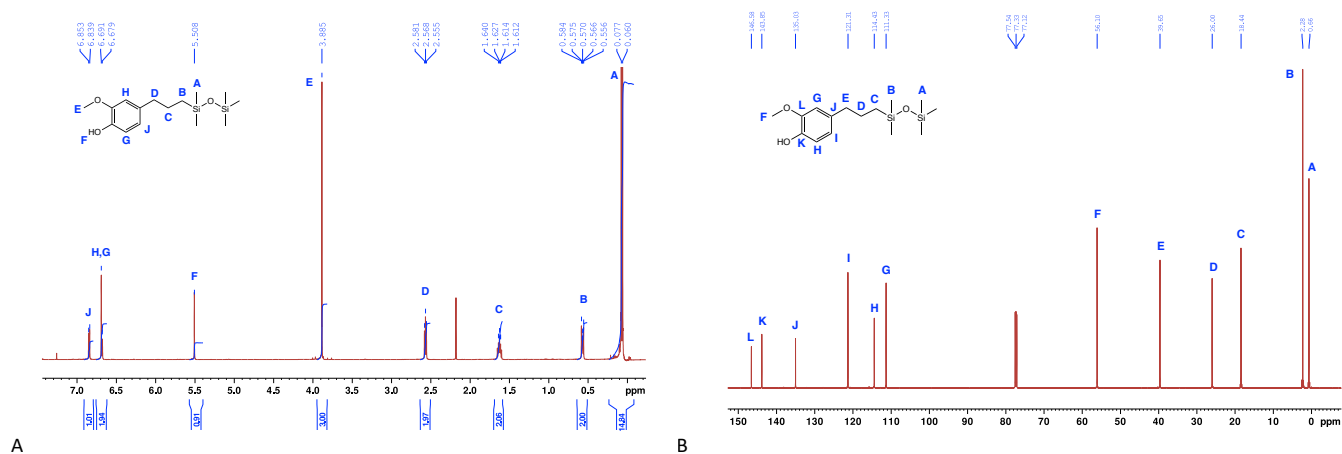

Figure S1 A) <sup>1</sup>H NMR and B) <sup>13</sup>C NMR of **1**.

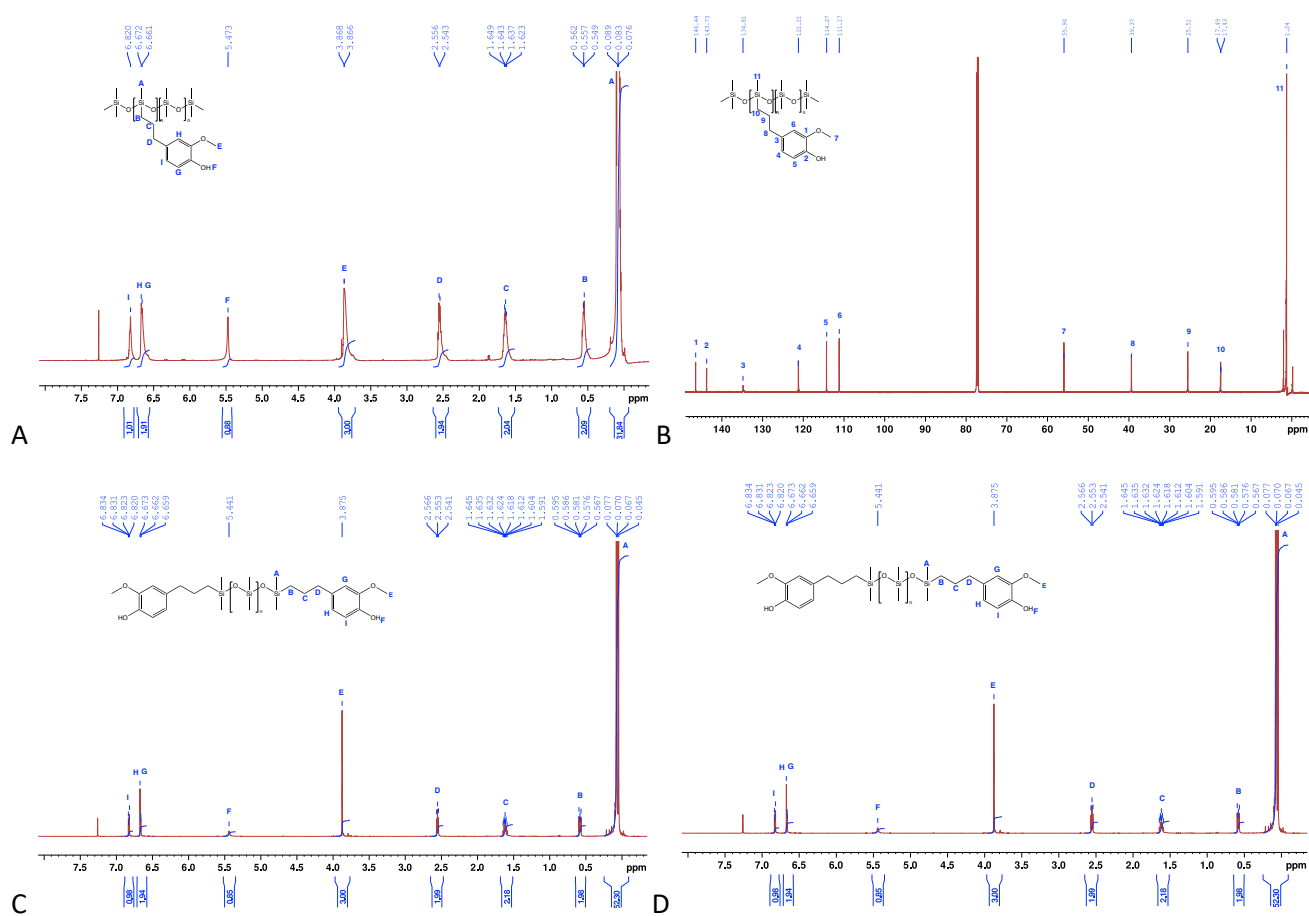

Figure S2. A,C) <sup>1</sup>H NMR and B,D) <sup>13</sup>C NMR of **P15-Eu** and **T12-Eu**, respectively.

## GC/MS

The GC/MS trace of the oxidation of **1** with BPO shows 6 principal compounds, labelled 1-6. Compounds 1/2; 3/4; and 5/6 are each related, with the latter being 2 amu less (missing the constituents of H<sub>2</sub>) than the earlier peak: 312 vs 310 (starting material **1**); 432 vs 430 and 622 vs 620 (dimeric product **3**). The compounds responsible for 432/430 are proposed to be compound **6** formed through equilibration from dimer **3**. Note that this compound was not seen in the starting materials. An alternative is the presence of small amounts of M<sup>H</sup>M<sup>H</sup> in the original formation of compound **1**. With these assumptions, the product mixture is 55% product. A more conservative value shows the peak at 312 **1** and its dimer **3** in a 5:1 ratio, or 20%. Sensitivity factors have been assumed to be identical for all compounds.

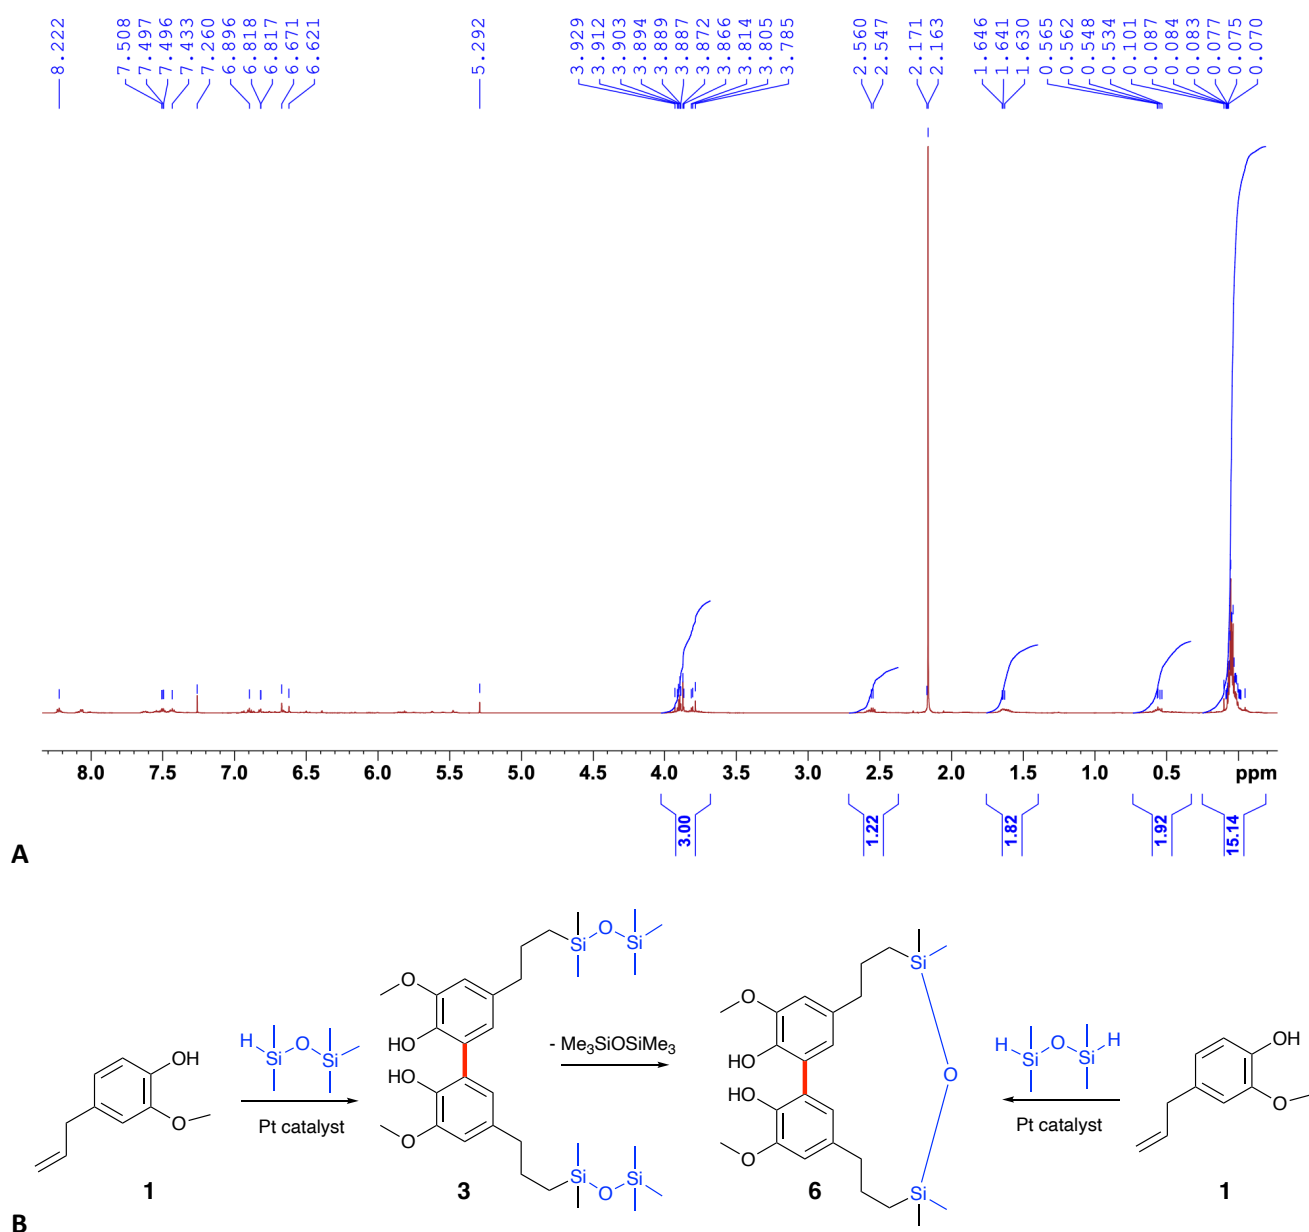

Figure S3 A) <sup>1</sup>H NMR and B) proposed structures of products **3** with m/z 2 less than expected.

Analysis Name: MABTQ30457.D  
Method: FSTFS\_340  
Sample Name: Mmeu 1 BPO

Print Date: 2022-02-15 1:39:05 PM  
Acq. Date: 2022-02-14 3:45:00 PM

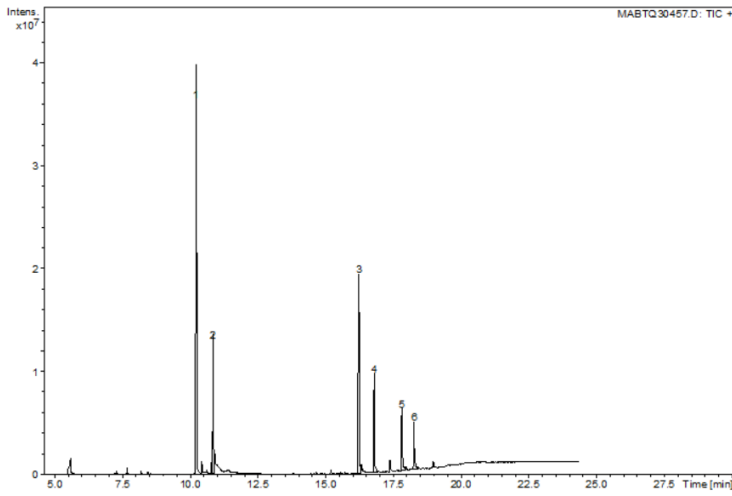

| Peak | Comp-<br>ound | Retention<br>time | Area     | Area% |
|------|---------------|-------------------|----------|-------|
| 1    | 1             | 15.5              | 61698478 | 26.9  |
| 2    | 1             | 11.0              | 18331738 | 8.0   |
| 3    | 6             | 16.5              | 68418186 | 29.8  |
| 4    | 6             | 17.0              | 34854476 | 15.2  |
| 5    | 3             | 18.1              | 11761055 | 5.1   |
| 6    | 3             | 18.5              | 13802773 | 6.0   |

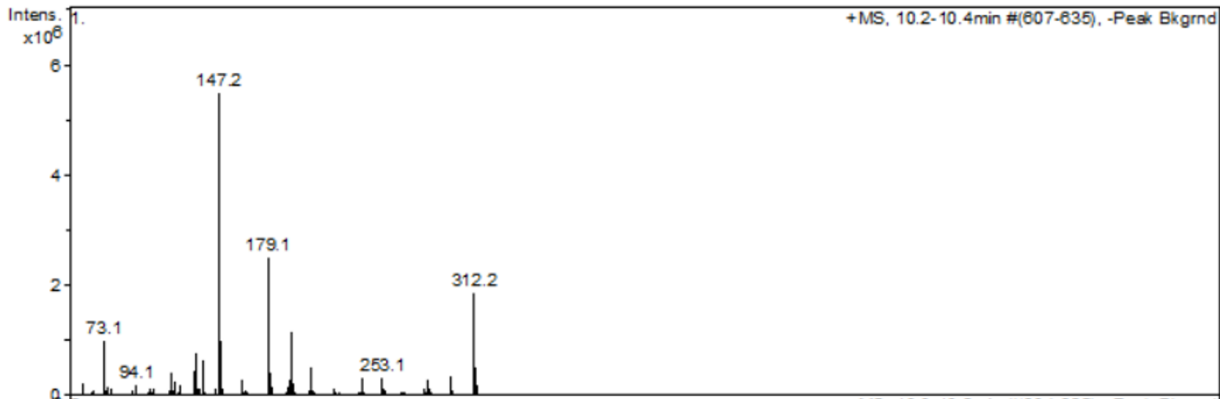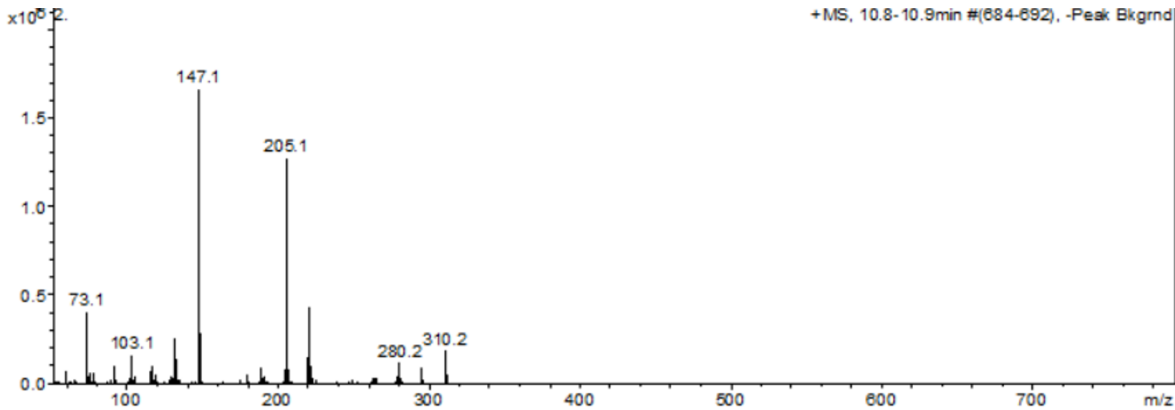

2)

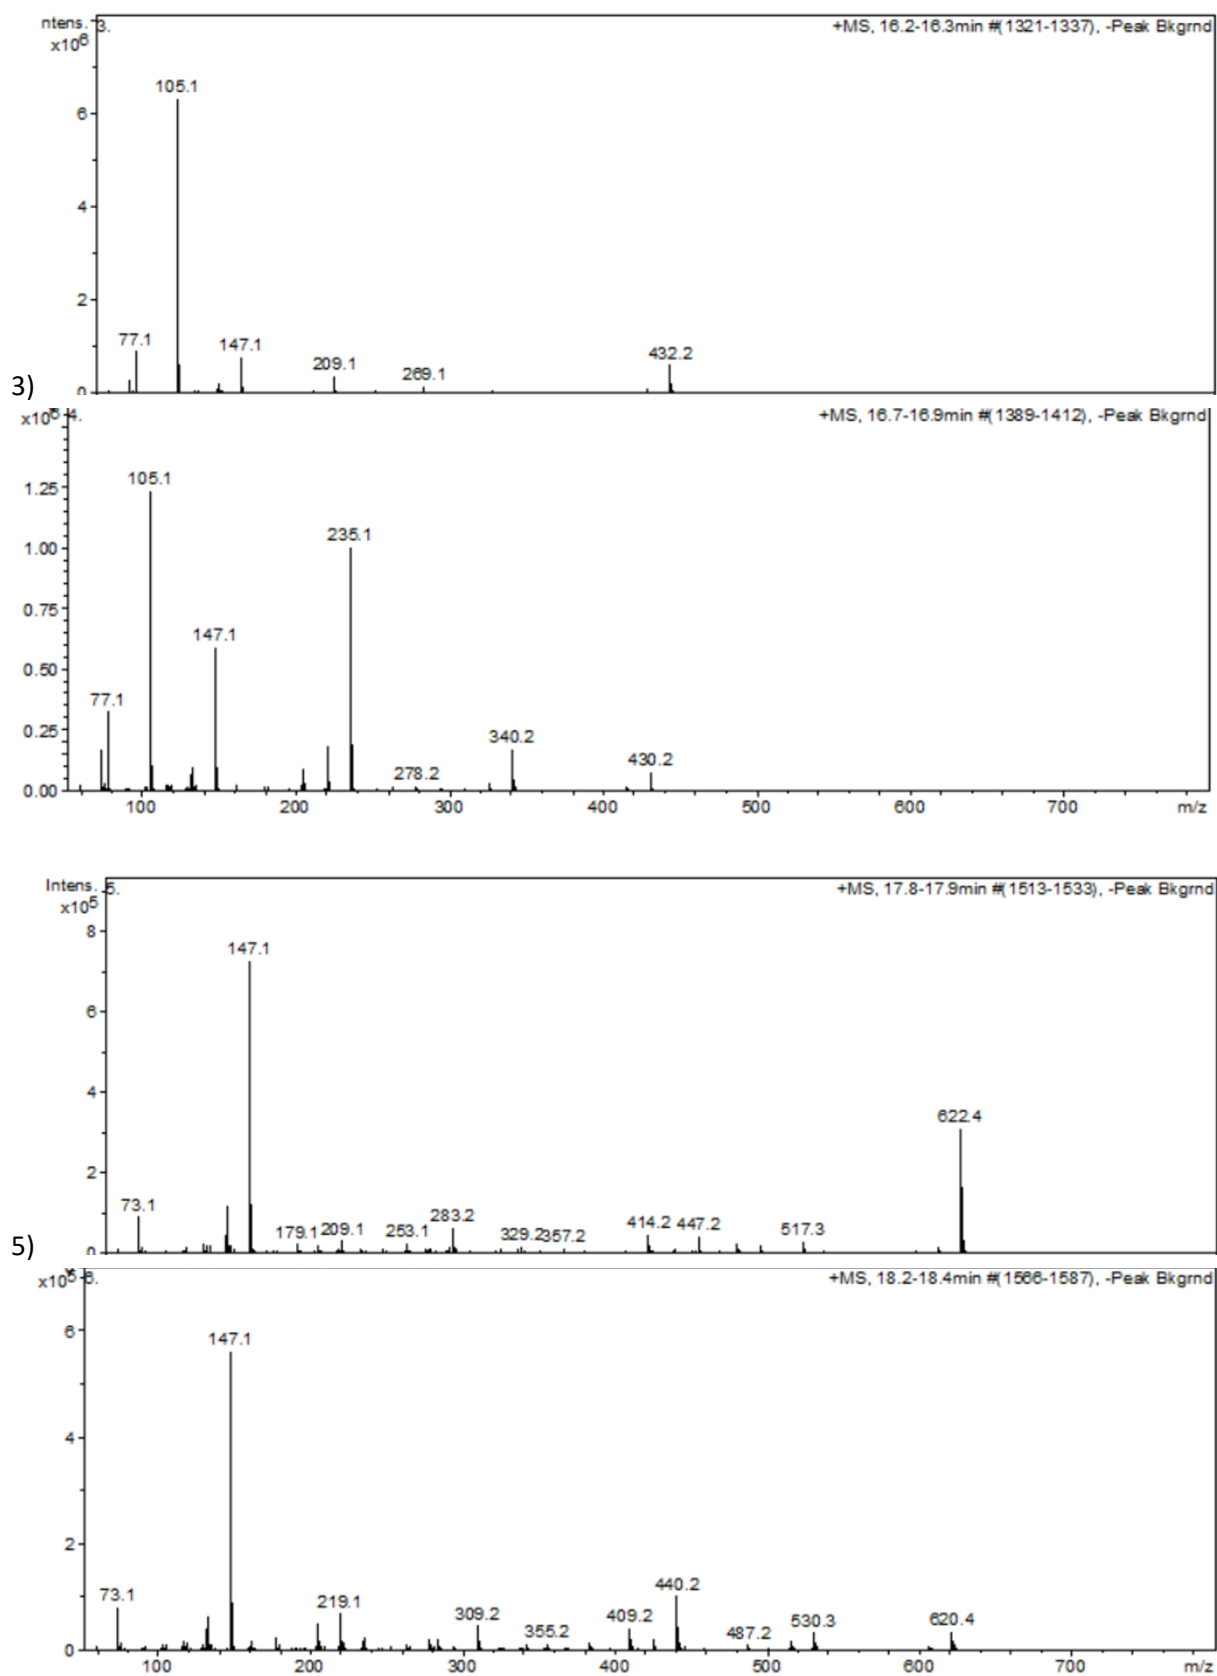

4)

6)

Figure S4 GC trace, intensity table of the 6 GC peaks seen, and their mass spectra Figure 1 A→C showing conversion of about 20% of **3** from **1**.

Table S1. Chain extension parameters of **T0-Eu** and **T12-Eu**

| <b>T0-Eu</b>      |                                  |                  |                                   |
|-------------------|----------------------------------|------------------|-----------------------------------|
| <b>T0-Eu (g)</b>  | <b>Molar equivalents of DTBP</b> | <b>mmol DTBP</b> | <b>Volume (<math>\mu</math>L)</b> |
| 0.4               | 1                                | 0.86             | 159                               |
| 0.4               | 2                                | 1.73             | 318                               |
| 0.4               | 5                                | 4.32             | 794                               |
| <b>T0-Eu (g)</b>  | <b>Molar equivalents of BPO</b>  | <b>mmol BPO</b>  | <b>weight (mg)</b>                |
| 0.4               | 1                                | 0.86             | 209.4                             |
| 0.4               | 2                                | 1.73             | 418.8                             |
| 0.4               | 5                                | 4.32             | 1047                              |
| <b>T12-Eu</b>     |                                  |                  |                                   |
| <b>T12-Eu (g)</b> | <b>Molar equivalents of DTBP</b> | <b>mmol DTBP</b> | <b>Volume (<math>\mu</math>L)</b> |
| 0.4               | 1                                | 0.27             | 49                                |
| 0.4               | 2                                | 0.53             | 98                                |
| 0.4               | 5                                | 1.33             | 245                               |
| <b>T12-Eu (g)</b> | <b>Molar equivalents of BPO</b>  | <b>mmol BPO</b>  | <b>weight (mg)</b>                |
| 0.4               | 1                                | 0.27             | 64.6                              |
| 0.4               | 2                                | 0.53             | 129.1                             |
| 0.4               | 5                                | 1.33             | 322.8                             |

Table S2. GPC data from chain extension studies using varying equivalents of BPO and DTBP

| <b>Eugenol-modified M<sup>H</sup>M<sup>H</sup></b> |                        |                      |                      |                               |
|----------------------------------------------------|------------------------|----------------------|----------------------|-------------------------------|
| <b>Peroxide</b>                                    | <b>Equiv. peroxide</b> | <b>M<sub>n</sub></b> | <b>M<sub>w</sub></b> | <b><math>\bar{D}_M</math></b> |
| No peroxide<br>DTBP                                | 0                      | 285                  | 300                  | 1.0478                        |
|                                                    | 1                      | 330                  | 395                  | 1.1953                        |
|                                                    | 2                      | 615                  | 685                  | 1.1135                        |
|                                                    | 5                      | 850                  | 1255                 | 1.4826                        |
| BPO                                                | 1                      | 340                  | 400                  | 1.1812                        |
|                                                    | 2                      | 380                  | 500                  | 1.3102                        |
|                                                    | 5                      | 1240                 | 2100                 | 1.695                         |
| <b>Eugenol-modified T12</b>                        |                        |                      |                      |                               |
| No peroxide<br>DTBP                                | 0                      | 1555                 | 2150                 | 1.38                          |
|                                                    | 1                      | 1720                 | 2290                 | 1.3329                        |
|                                                    | 2                      | 1840                 | 2650                 | 1.4381                        |
|                                                    | 5                      | 2465                 | 5445                 | 2.2104                        |
| BPO                                                | 1                      | 2655                 | 5045                 | 1.8994                        |
|                                                    | 2                      | 2630                 | 6200                 | 2.3608                        |
|                                                    | 5                      | 4830                 | 12120                | 2.5102                        |

Table S3. Oxidative coupling to create elastomers with DTBP

| <b>Oxidative coupling of eugenol-modified P50-Eu (0.5 g, 1.51 mmol EUG)</b> |           |                |
|-----------------------------------------------------------------------------|-----------|----------------|
| Molar equiv. DTBP                                                           | mmol DTBP | vol ( $\mu$ L) |
| 0                                                                           | 0         | 0              |
| 0.2                                                                         | 0.30      | 56             |
| 0.4                                                                         | 0.60      | 111            |
| 0.6                                                                         | 0.90      | 167            |
| 0.8                                                                         | 1.21      | 222            |
| 1                                                                           | 1.51      | 278            |
| 1.5                                                                         | 2.27      | 417            |
| <b>Oxidative coupling of eugenol-modified P30-Eu (0.8 g 1.95 mmol EUG)</b>  |           |                |
| 0                                                                           | 0         | 0              |
| 0.2                                                                         | 0.39      | 72             |
| 0.4                                                                         | 0.78      | 143            |
| 0.6                                                                         | 1.17      | 215            |
| 0.8                                                                         | 1.56      | 287            |
| 1                                                                           | 1.95      | 359            |
| 1.5                                                                         | 2.93      | 538            |
| <b>Oxidative coupling of eugenol-modified P15-Eu (0.8 g 2.46 mmol EUG)</b>  |           |                |
| 0                                                                           | 0         | 0              |
| 0.2                                                                         | 0.49      | 49             |
| 0.4                                                                         | 0.98      | 98             |
| 0.6                                                                         | 1.48      | 147            |
| 0.8                                                                         | 1.97      | 196            |
| 1                                                                           | 2.46      | 245            |
| 1.5                                                                         | 3.69      | 367            |

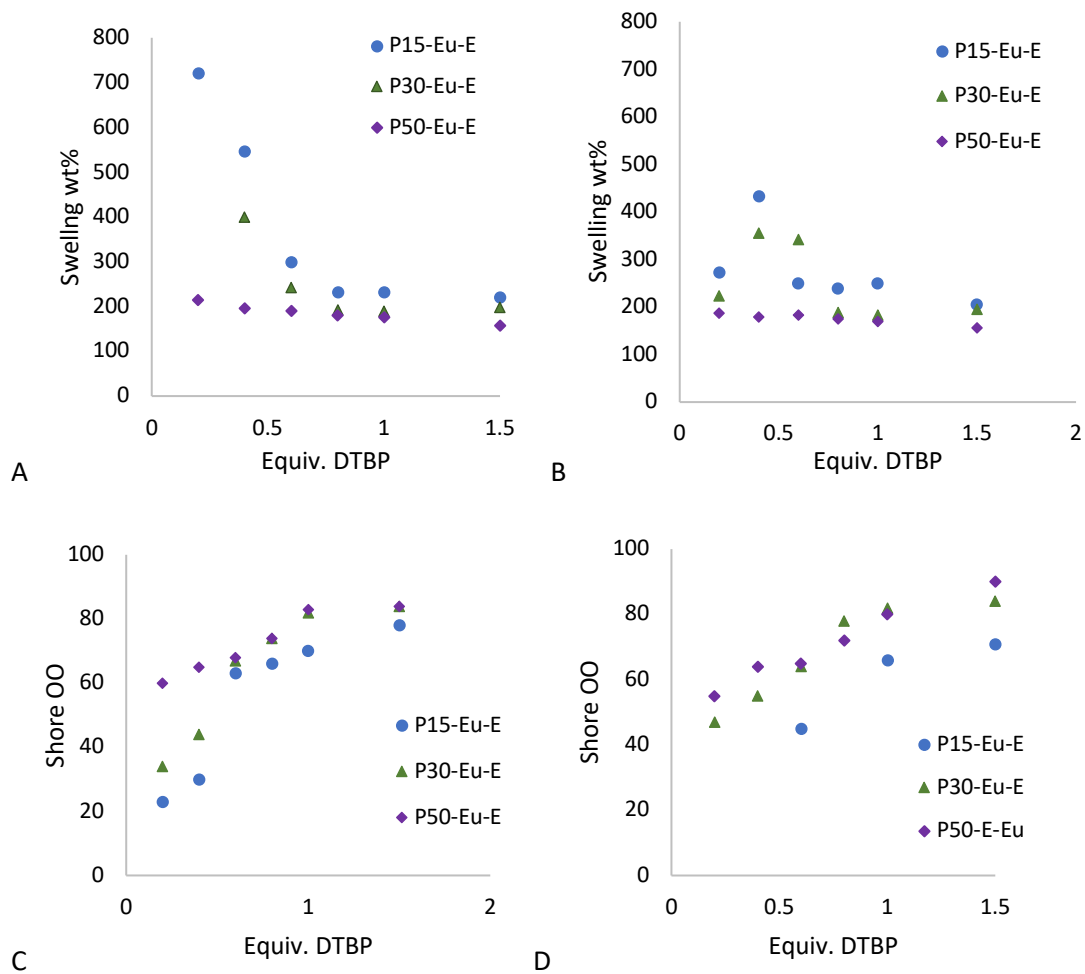

Figure S5. Swelling (wt% increase) of A) first prepared elastomers and B) after extraction with toluene. Shore OO hardness of C) first prepared elastomers and D) after extraction with toluene.

Table S4. Mass loss after first swelling in solvent and Shore OO data before and after extraction in toluene.

| raw elastomers   |          |          |         |        |            |                   |
|------------------|----------|----------|---------|--------|------------|-------------------|
| P50              |          |          |         |        |            |                   |
| equivalents DTBP | Shore OO | starting | swollen | final  | % swelling | %sol <sup>a</sup> |
| 0.2              | 60       | 0.1622   | 0.3472  | 0.1104 | 214.1      | 31.9              |
| 0.4              | 65       | 0.1604   | 0.3141  | 0.1275 | 195.8      | 20.5              |
| 0.6              | 68       | 0.163    | 0.3095  | 0.1291 | 189.9      | 20.8              |
| 0.8              | 74       | 0.1611   | 0.2903  | 0.1331 | 180.2      | 17.4              |
| 1                | 83       | 0.1608   | 0.2826  | 0.1341 | 175.7      | 16.6              |
| 1.5              | 84       | 0.1622   | 0.2564  | 0.1436 | 158.1      | 11.5              |
| P30              |          |          |         |        |            |                   |
| equivalents DTPB | Shore OO | starting | swollen | final  | % swelling | %sol              |
| 0.2              | 34       | 0.1661   | 0.7204  | 0.1047 | 433.7      | 37.0              |
| 0.4              | 44       | 0.1579   | 0.6307  | 0.0999 | 399.4      | 36.7              |
| 0.6              | 67       | 0.1658   | 0.4014  | 0.1405 | 242.1      | 15.3              |
| 0.8              | 74       | 0.1615   | 0.3119  | 0.1471 | 193.1      | 8.9               |
| 1                | 82       | 0.1665   | 0.3159  | 0.154  | 189.7      | 7.5               |
| 1.5              | 84       | 0.1583   | 0.3148  | 0.1424 | 198.9      | 10.0              |
| P15              |          |          |         |        |            |                   |
| equivalents DTBP | Shore OO | starting | swollen | final  | % swelling | %sol              |
| 0.2              | 23       | 0.1649   | 1.1899  | 0.0563 | 721.6      | 65.9              |
| 0.4              | 30       | 0.1637   | 0.8965  | 0.0803 | 547.6      | 50.9              |
| 0.6              | 63       | 0.1659   | 0.4963  | 0.1234 | 299.2      | 25.6              |
| 0.8              | 66       | 0.1658   | 0.3845  | 0.1345 | 231.9      | 18.9              |
| 1                | 70       | 0.1645   | 0.3832  | 0.141  | 232.9      | 14.3              |
| 1.5              | 78       | 0.1619   | 0.3576  | 0.1364 | 220.9      | 15.6              |

<sup>a</sup> Mass loss after 1 extraction with toluene.



| extracted elastomers |          |          |         |       |            |                    |  |
|----------------------|----------|----------|---------|-------|------------|--------------------|--|
| P50                  |          |          |         |       |            |                    |  |
| equivalents DTBP     | Shore OO | starting | swollen | final | % swelling | % sol <sup>a</sup> |  |
| 0.2                  | 60       | 49       | 91.7    | 45.5  | 187.2      | 7.1                |  |
| 0.4                  | 65       | 49.4     | 88.3    | 46.6  | 178.7      | 5.7                |  |
| 0.6                  | 68       | 46.3     | 85.1    | 44.1  | 183.8      | 4.8                |  |
| 0.8                  | 74       | 51.1     | 89.3    | 49.5  | 174.8      | 3.1                |  |
| 1                    | 83       | 50.4     | 85.5    | 47.9  | 169.6      | 5.0                |  |
| 1.5                  | 84       | 50       | 78      | 47.6  | 156.0      | 4.8                |  |
| P30                  |          |          |         |       |            |                    |  |
| equivalents DTPB     | Shore OO | starting | swollen | final | % swelling | % sol              |  |
| 0.2                  | 34       | 52.8     | 117.8   | 47.7  | 223.1      | 9.7                |  |
| 0.4                  | 44       | 52.9     | 188.4   | 43.2  | 356.1      | 18.3               |  |
| 0.6                  | 67       | 50.1     | 171.6   | 47.1  | 342.5      | 6.0                |  |
| 0.8                  | 74       | 48.3     | 91.4    | 45.8  | 189.2      | 5.2                |  |
| 1                    | 82       | 54.3     | 99.5    | 51.4  | 183.2      | 5.3                |  |
| 1.5                  | 84       | 46.5     | 90.7    | 44.4  | 195.1      | 4.5                |  |
| P15                  |          |          |         |       |            |                    |  |
| equivalents DTBP     | Shore OO | starting | swollen | final | % swelling | % sol              |  |
| 0.2                  | 23       | 40.9     | 111.6   | 31.3  | 272.9      | 23.5               |  |
| 0.4                  | 30       | 52.6     | 227.9   | 44.6  | 433.3      | 15.2               |  |
| 0.6                  | 63       | 53.1     | 132.5   | 48    | 249.5      | 9.6                |  |
| 0.8                  | 66       | 53.8     | 129     | 49.4  | 239.8      | 8.2                |  |
| 1                    | 70       | 48.8     | 121.7   | 45.8  | 249.4      | 6.2                |  |
| 1.5                  | 78       | 54.8     | 112.6   | 52.5  | 205.5      | 4.2                |  |

<sup>a</sup> Mass loss after 3 extractions with toluene.

Table S5. Serial dilutions for DPPH assays

| serial dilutions | [eugenol] (mM) | [DPPH] (mM) | total vol (mL) |
|------------------|----------------|-------------|----------------|
| 100%             | 50             | 0.1         | 1              |
| 50%              | 25             | 0.1         | 1              |
| 10%              | 5              | 0.1         | 1              |
| 1%               | 0.5            | 0.1         | 1              |
| 0.10%            | 0.05           | 0.1         | 1              |
| 0.01%            | 0.005          | 0.1         | 1              |
| 0.001%           | 0.0005         | 0.1         | 1              |

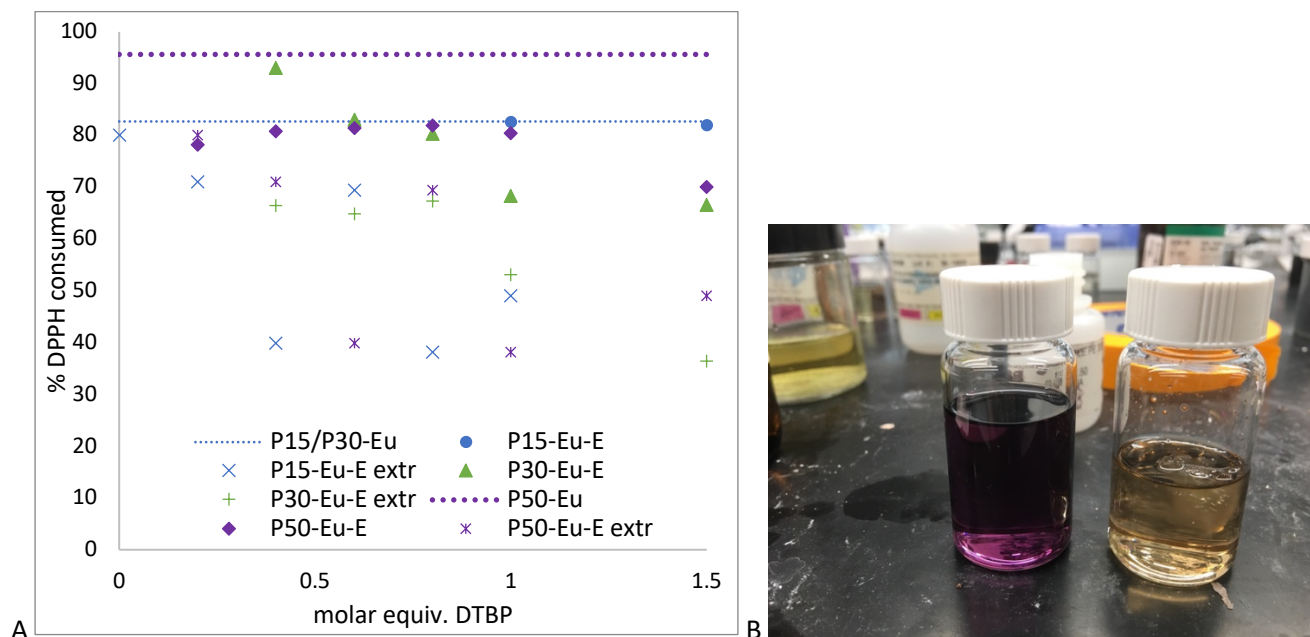

Figure S6 Antioxidant activity, by DPPH assay, of A) **P15-Eu-E**; **P30-Eu-E**; **P50-Eu-E** as prepared, and after extraction. B) Typical color change upon reaction of DPPH with phenols (left - before, right - after reaction).

The differences between Shore hardness (or Young's modulus<sup>1</sup>) for filled and unfilled silicones is rather significant. Note that Sylgard is typically filled with MQ resins, a related but distinct type of reinforcing agent.<sup>2</sup> Selected examples of elastomers cured using hydrosilylation, moisture cure (RTV) and phenolic coupling have comparable Shore hardness values (Table S6).

Table S6. A comparison of curing techniques for silicone elastomers (to prepare 0.8 g elastomer).

| <b>Commercial Platinum-cure silicone rubber (Sylgard 184)<sup>a</sup></b> |                       |                         |           |             |                                |  |
|---------------------------------------------------------------------------|-----------------------|-------------------------|-----------|-------------|--------------------------------|--|
| Crosslinker                                                               | Chain extender        | Pt <sup>b</sup>         | Filler    | Cure temp.  | Shore OO                       |  |
| H-PDMS                                                                    | vinyl-terminated PDMS | 5-20 ppm                | MQ resins | RT, 24 h    | ~ 83 (43 Shore A) <sup>1</sup> |  |
| <b>Homemade Platinum cure silicone</b>                                    |                       |                         |           |             |                                |  |
| H-PDMS                                                                    | vinyl-terminated PDMS | 5 ppm                   | none      | RT, 24 h    | 40x                            |  |
| <b>Commercial RTV (Dowsil 786)</b>                                        |                       |                         |           |             |                                |  |
| Crosslinker                                                               | Chain extender        | mol% of Sn <sup>c</sup> | Filler    | Cure temp.  | Shore OO                       |  |
| Si(OAc) <sub>4</sub>                                                      | HO-terminated PDMS    | <1%                     | silica    | RT, 24h     | (25 Shore A) <sup>d</sup>      |  |
| <b>Homemade RTV (moisture cure)</b>                                       |                       |                         |           |             |                                |  |
| MeSi(OMe) <sub>3</sub>                                                    | HO-terminated PDMS    | 1%                      | none      | RT, 24h     | 80 (25 Shore A)                |  |
| <b>P30-Eu-E</b>                                                           |                       |                         |           |             |                                |  |
| Crosslinker                                                               | Chain extender        | DTBP                    | Filler    | Cure temp.  | Shore OO                       |  |
| Pendent eugenol silicone                                                  | NA                    | 195%                    | none      | 130 °C, 6 h | 75-85                          |  |

<sup>a</sup> If higher temperatures are used, Sylgard will completely cure in about one hour at 100 °C, or 15 minutes at 150 °C ([www.dow.com/content/dam/dcc/documents/en-us/productdatasheet/11/11-31/11-3184-sylgard-184-elastomer.pdf](http://www.dow.com/content/dam/dcc/documents/en-us/productdatasheet/11/11-31/11-3184-sylgard-184-elastomer.pdf) accessed May 30, 2023.). <sup>b</sup> Karstedt's Pt catalyst. <sup>c</sup> Dibutyltin dilaurate. <sup>d</sup> [www.dow.com/content/dam/dcc/documents/en-us/productdatasheet/95/95-10/95-1047-01-dowsil-786-silicone-sealant.pdf?iframe=true](http://www.dow.com/content/dam/dcc/documents/en-us/productdatasheet/95/95-10/95-1047-01-dowsil-786-silicone-sealant.pdf?iframe=true), accessed May 30, 2023. Note: full cure is not noted on this sheet, but all data reported was 1 week after starting cure.

## References

1. A. W. Mix and A. J. Giacomini, *J. Testing Eval.*, 2011, **39**, 696-705.
2. D. H. Flagg and T. J. McCarthy, *Macromolecules*, 2016, **49**, 8581-8592.
